# Supplementary material for: Using Natural Language Processing to Enable In-depth Analysis of Clinical Messages Posted to an Internet Mailing List: A Feasibility Study
Source: J Med Internet Res. 2011 Nov 23;13(4):e98. doi: 10.2196/jmir.1799 (PMC3236668; doi:10.2196/jmir.1799)
Supplement: Supplementary file 1 [file jmir_v13i4e98_app1.pdf]

**Multimedia Appendix 1. Classification of dental phrases with keywords in blue small caps. Table of keywords by category displayed at the end of the classification.**

**1. Systemic Disease**

**1.1 cardiac system**

lowered **PLAQUE** interface  
sticky **PLAQUES** arrived  
**ATHEROSCLEROTIC** plaques  
**ARTERIAL** plaques

accelerates **ATHEROSCLEROSIS** apolipoprotein  
accelerates atherosclerosis  
atherosclerosis **APOLIPOPROTEIN** deficient  
apolipoprotein deficient

**TREADMILL** result hematoma  
dropped treadmill result

atrial fibrillation  
**MYOCARDIAL** infarction  
remain placement catheter  
sudden **CARDIAC** arrest  
cardiac arrest  
aortic valves  
vessels stenosis  
coronal vessels **STENOSIS**  
adverse events crestor  
**ENDOTHELIAL DYSFUNCTION**  
interval **PULSES**  
**PERIPHERAL** arterial  
attacks strokes  
marfan **SYNDROME**

**1.2 nervous system**

**NEUROTOXIC EFFECTS** nervous  
**EPISODIC** migraine  
**EPISODE PORPHYRIA**  
trigger episode porphyria  
peripheral **NEUROPATHY**  
**ALZHEIMER** alzheimer alzheimer  
hypnotic trance  
**NEURONS** firing

**1.3 infectious disease**

community acquired **PNEUMONIA**  
**CHLAMYDIA** mycoplasma  
chlamydia **PNEUMONIAE**  
**SHINGLES** acyclovir  
herpes **ZOSTER**  
zoster shingles  
hematogenous spread

**1.4 general care**

incident triggered history  
terminal **RESUSCITATE** placed  
terminal resuscitate

## **1.5 orthopedic**

tendon rupture  
rheumatoid ARTHRITIS  
artificial joints

## **1.6 uro-genital system**

genital urinary  
estrogen deficiency  
metabolic syndrome  
preterm births

## **2. Endodontics**

### **2.1 diagnosis**

irreversible PULPITIS apical  
pulpitis MAXILLARY radiographically  
orifices PULPAL  
possibilities pulpal exposure  
LESION resorption progressed

### **2.2 treatment**

filled OBTURATION MEDICATE  
obturation medicate period  
fistula filled obturation  
obturation medicate  
pulpal EXPOSURE entering  
exposure entering latter

draining fistula filled  
draining FISTULA  
actively draining fistula  
actively draining  
irreversible pulpitis

### **2.3 cosmetic**

retreat SURGICALLY BLEACH  
surgically bleach internally

## **3. Orthodontics**

### **3.1 retainer**

retainer answers ORTHODONTISTS  
retainers scares proper  
removable nightly RETAINER  
nightly retainer answers

### **3.2 progressive**

progressive ORTHODONTICS  
hearing progressive orthodontics

### **3.3 development**

MANDIBULAR erupted intact  
premolars addition substitution

## **4. Periodontics**

### **4.1 prevention**

maintaining PERIODONTALLY discussed  
terrible maintaining periodontally  
hygienist CALCULUS tartar  
calculus tartar difficult  
calculus tartar  
supragingival scaling prophylaxis

#### **4.2 diagnosis**

pericoronitis PERICORONITIS  
fracture periodontally stable

#### **4.3 ultrasound**

intensity pulsed ULTRASOUND  
PULSED ultrasound

#### **4.4 etiology**

OSTEOCLAST formation  
OSTEOCLASTIC activity

### **5. Restorative Dentistry**

#### **5.1 diagnosis**

CORONAL remnants deciduous  
coronal remnants  
NONRESTORABLE possibilities thought  
nonrestorable possibilities

#### **5.2 instruments**

torque wrench  
turbine HANDPIECES

#### **5.3 fabrication**

fabrication MATRIX slightly  
veneer fabrication matrix  
sandblasting zirconia  
inlays onlays  
prepped trimmed

#### **5.4 occlusion**

occlusion LOOSENED severely  
loosened severely period  
loosened severely  
centric longer touching  
prepping cuspids  
vertical dimension  
LATERAL excursions  
PARAFUNCTIONAL forces

#### **5.5 esthetic**

academy comprehensive esthetics  
refresh SHADES  
refresh shades replaced

#### **5.6 function**

FUNCTIONS speaking swallowing

#### **5.7 temporary treatment**

TEMPORARILY restore CARIOUS  
interim TEMPORARY maintainer

### 5.8 relines

permanent chairside RELINES  
chairside relines therefore  
chairside relines

### 5.9 splint

provisional SPLINTS  
distally besides SPLINTING

### 5.10 mineralization

demineralization enamel enhances  
recovery demineralized enamel  
recovery demineralized  
readily demineralized enamel  
readily DEMINERALIZED  
demineralized enamel CARIOGENIC  
enamel cycles DEMINERALIZATION  
cycles demineralization  
inhibits demineralization enamel  
saliva inhibits demineralization  
inhibits demineralization  
  
demineralization REMINERALIZATION continue  
cycles demineralization remineralization  
demineralization remineralization  
remineralization recovery demineralized  
enhances remineralization recovery  
enamel enhances remineralization  
enhances remineralization  
  
CALCIUM phosphate MINERALIZED  
phosphate mineralized enamel  
phosphate mineralized  
MINERAL density  
calcium phosphate

### 5.11 buffering

neutral BUFFERING capacity  
saliva neutral buffering  
neutral buffering  
buffering capacity present  
buffering capacity  
SALIVA calcium phosphate

### 5.12 other

EMERGENCE profiles  
emergence profile  
scars proper MAXILLARY  
accurately damage framework  
MAXILLA MANDIBLE predictable  
DISINFECTING impressions  
fluorescence measurements

## **6. Oral and Maxillofacial Surgery**

### **6.1 diagnosis**

painful [SEQUESTRUM](#) lingual  
painful sequestrum  
presented painful sequestrum  
result hematoma partner  
[HEMATOMA](#) partner painful  
hematoma partner  
septic [ARTHRITIS](#) [OSTEOMYELITIS](#)  
osteomyelitis [ANAEROBIC](#)  
osteonecrosis secondary [BISPHOSPHONATE](#)  
[OSTEONECROSIS](#) secondary  
depressed sockets  
remnants deciduous  
linear lesion triangular  
[LESION](#) triangular shaped  
triangular shaped [ULCERS](#)  
[LATERALS](#) canines  
[ASYMPTOMATIC BILATERAL](#) opposite  
asymptomatic bilateral

### **6.2 other**

minimally [INVASIVE](#)  
tonsils [TONSILS](#)  
[SALIVARY](#) glands  
thinks retreat [SURGICALLY](#)  
extracting [MANDIBULAR](#) erupted  
lancet [INFECT](#) author  
lancet infect  
socket inferior [ALVEOLAR](#)

## **7. Other Oral Diseases**

### **7.1 oral cancer**

[LICHEN](#) planus biopsy  
lichen planus  
marrow transplant

### **7.2 skin / mucosa**

[HERPES](#) simplex causes  
herpes simplex  
recurrent [APHTHOUS](#)  
aphthous [ULCERS](#)

## **8. Radiology**

phosphor plates  
optical [SCANNING](#)  
scanning [ELECTRON](#)  
electron microscope  
interventional [RADIOLOGY](#)

[MAXILLARY RADIOGRAPHICALLY](#) flying  
radiographically flying europe

## **9. Causative Agent**

### **9.1 bacteria**

predominant [ANAEROBES](#)

growth mutans streptococci  
mutans streptococci presence  
mutans [STREPTOCOCCI SALIVARY](#)  
mutans streptococci  
staphylococcus aureus

conclude invasive [GINGIVALIS](#)  
invasive gingivalis accelerates  
gingivalis accelerates [ATHEROSCLEROSIS](#)  
porphyromonas gingivalis

[FUSOBACTERIUM](#) peptostreptococcus  
[HELICOBACTER](#) pylori  
[PNEUMOCOCCAL BACTEREMIA](#)  
actinomyces comitans rectus

## **9.2 behavioral factors**

coffee [SMOKER](#) drinks  
smoker drinks cranberry  
[SMOKELESS](#) tobacco

various [DIETARY](#) sugars  
dietary sugars  
brushing flossing

## **10. Medication**

### **10.1 immune system**

[MEDICATION](#) allergies [CONTRAINDICATIONS](#)  
[ALLERGIES](#) contraindications [PRESCRIBED](#)  
allergies contraindications  
[EFFECTIVENESS](#) [PNEUMOCOCCAL](#) vaccine  
epinephrine anaphylaxis  
[PROINFLAMMATORY](#) cytokines

### **10.2 antibiotics**

contraindications prescribed amoxicillin  
prescribed amoxicillin hydrocodone  
[AMOXICILLIN](#) hydrocodone friend  
amoxicillin hydrocodone  
antimicrobial agents  
tylenol codeine  
broader spectrum

### **10.3 cardiac system**

propofol [PROPOFOL](#)

### **10.4 anesthesia**

valium triazolam  
[PARESTHESIAS](#) solutions [ARTICAINE](#)  
paresthesias solutions  
viscous [LIDOCAINE](#) benadryl  
[XYLOCAINE](#) [CARBOCAINE](#)

### **10.5 complementary and alternative medicine**

complementary [MEDICINE](#) chiropractic  
pharmaceutical herbal remedy

herbal remedy  
HERBAL remedies  
homeopathic REMEDY  
vitamins NUTRITIONAL

#### **10.6 cancer drugs**

considers possible methotrexate  
METHOTREXATE causative factor  
methotrexate causative  
intravenous BISPHOSPHONATES

#### **10.7 other**

NARCOTICS integral practicing  
narcotics integral  
documented PRESCRIBE carefully  
SALINE sodium bicarbonate  
saline irrigating  
reflex anybody placebo  
compounding pharmacy

### **11. Materials**

#### **11.1 bleaching**

carbamide PEROXIDE  
hydrogen peroxide  
SODIUM bicarbonate  
sodium perborate

#### **11.2 resin materials**

resins lining beverage  
bonded RETAINERS scares  
phosphoric PRIMER  
scotchbond primer activated  
scotchbond primer  
primer activated primer  
LESION geristore ionomer  
geristore IONOMER location  
geristore ionomer  
ADHESIVE interface adhesive  
adhesive flocked adhesive  
expressed FLOCKED pooling  
flocked pooling material  
flocked adhesive expressed  
flocked adhesive  
adhesive expressed flocked  
adhesive flocked  
ULTRADENT continually syringes  
continually syringes ultradent  
continually syringes  
oraseal ultradent continually  
HELIOMOLAR filtek supreme  
heliomolar filtek

#### **11.3 microlux**

expensive purchasing microlux  
purchasing MICROLUX  
purchasing microlux addent

addent microlux  
microlux addent

#### **11.4 anesthesia**

anesthetic [NEEDLES](#) manufactures  
needles manufactures manufactures  
manufactures manufactures needles

#### **11.5 mercury toxicity**

reward [MERCURY](#) assured  
contain mercury [NEUROTOXIC](#)

#### **11.6 oral and maxillofacial surgery**

[FREEZE](#) mineralized  
[FROZEN](#) concentrate

#### **11.7 other**

blaylock fluoride  
triangular shaped [HANDPIECE](#)  
resorbable [RESORBABLE](#)  
resilon percha  
cotton pellet

### **12. Basic Sciences**

#### **12.1 inflammation**

[FUNCTION](#) glucose homeostasis  
glucose homeostasis  
[GLUCOSE](#) homeostasis [INFLAMMATION](#)

#### **12.2 anatomy**

dentinal tubules  
inferior [ALVEOLAR](#) distal  
inferior alveolar  
[PERIPHERAL](#) fibers  
mental foramen  
mucous membranes

#### **12.3 other**

molecular [BACTERIAL](#) antigens  
breaking biofilm orifices  
microbiology immunology  
touted interproximal

### **13. Research**

#### **13.1 literature**

pubmed indexed [MEDLINE](#)  
[PUBMED](#) indexed  
indexed medline  
[PERIODONTOL](#) [sic] pubmed

#### **13.2 methods and statistics**

examiner reproducibility  
[RANDOMIZED](#) controlled trials  
[RANDOMLY](#) assigned  
linear regression  
confidence interval

inclusion criteria  
 causative factor coincidence  
 comparative **EFFECTIVENESS**  
 morbidity mortality  
**NUTRITION** examination survey

### 13.3 funding

clinic federally **FUNDED**  
 federally funded  
 funded grants  
 principal investigator  
 council scientific affairs

**Table. Keyword by category**

| <b>Keyword (including variants and closely related words)</b> | <b>Category</b> |
|---------------------------------------------------------------|-----------------|
| 1. plaque, plaques                                            | 1               |
| 2. atherosclerosis, atherosclerotic                           | 1, 9            |
| 3. arterial                                                   | 1               |
| 4. apolipoprotein                                             | 1               |
| 5. treadmill                                                  | 1               |
| 6. cardiac, myocardial, endothelial                           | 1               |
| 7. stenosis                                                   | 1               |
| 8. pulses, pulsed                                             | 1, 4            |
| 9. episode, episodic                                          | 1               |
| 10. porphyria                                                 | 1               |
| 11. alzheimer                                                 | 1               |
| 12. pneumonia, pneumoniae, pneumococcal                       | 1, 9, 10        |
| 13. chlamydia                                                 | 1               |
| 14. shingles, zoster                                          | 1               |
| 15. resuscitate                                               | 1               |
| 16. syndrome                                                  | 1               |
| 17. arthritis                                                 | 1, 6            |
| 18. pulpitis, pulpal                                          | 2               |
| 19. maxilla, maxillary                                        | 2, 5, 8         |
| 20. obturation                                                | 2               |
| 21. medicine, medicate, medication                            | 2, 10           |
| 22. exposure                                                  | 2               |
| 23. fistula                                                   | 2               |
| 24. surgically                                                | 2, 6            |
| 25. bleach                                                    | 2               |
| 26. retainer, retainers                                       | 3, 11           |
| 27. orthodontics, orthodontists                               | 3               |
| 28. mandible, mandibular                                      | 3, 5, 6         |
| 29. periodontally, periodontol [sic]                          | 4, 13           |
| 30. calculus                                                  | 4               |
| 31. pericoronitis                                             | 4               |
| 32. ultrasound                                                | 4               |
| 33. osteoclast, osteoclastic                                  | 4               |
| 34. coronal                                                   | 5               |
| 35. nonrestorable                                             | 5               |

|     |                                                                         |           |
|-----|-------------------------------------------------------------------------|-----------|
| 36. | matrix                                                                  | 5         |
| 37. | loosened                                                                | 5         |
| 38. | lateral, laterals, bilateral                                            | 5, 6      |
| 39. | function, functions, parafunctional, dysfunction                        | 1, 5, 12  |
| 40. | temporary, temporarily                                                  | 5         |
| 41. | shades                                                                  | 5         |
| 42. | carious, cariogenic                                                     | 5         |
| 43. | relines                                                                 | 5         |
| 44. | splints, splinting                                                      | 5         |
| 45. | mineral, mineralized, demineralized, demineralization, remineralization | 5         |
| 46. | calcium                                                                 | 5         |
| 47. | saliva, salivary                                                        | 5, 6, 9   |
| 48. | buffering                                                               | 5         |
| 49. | emergence                                                               | 5         |
| 50. | sequestrum                                                              | 6         |
| 51. | hematoma                                                                | 6         |
| 52. | osteomyelitis                                                           | 6         |
| 53. | bisphosphonate, bisphosphonates                                         | 6, 10     |
| 54. | osteonecrosis                                                           | 6         |
| 55. | lesion                                                                  | 2, 6, 11  |
| 56. | ulcers                                                                  | 6, 7      |
| 57. | asymptomatic                                                            | 6         |
| 58. | invasive                                                                | 6         |
| 59. | tonsils                                                                 | 6         |
| 60. | infect, disinfecting                                                    | 5, 6      |
| 61. | lichen                                                                  | 7         |
| 62. | herpes                                                                  | 7         |
| 63. | aphthous                                                                | 7         |
| 64. | electron                                                                | 8         |
| 65. | scanning                                                                | 8         |
| 66. | radiology, radiographically                                             | 8         |
| 67. | anaerobes, anaerobic                                                    | 6, 9      |
| 68. | streptococci                                                            | 9         |
| 69. | gingivalis                                                              | 9         |
| 70. | fusobacterium, helicobacter, bacteremia                                 | 9, 12     |
| 71. | smoker, smokeless                                                       | 9         |
| 72. | dietary                                                                 | 9         |
| 73. | contraindications                                                       | 10        |
| 74. | prescribe, prescribed                                                   | 10        |
| 75. | effects, effectiveness                                                  | 1, 10, 13 |
| 76. | inflammation, proinflammatory                                           | 10, 12    |
| 77. | amoxicillin                                                             | 10        |
| 78. | propofol                                                                | 10        |
| 79. | articaine, lidocaine, xylocaine, carbocaine                             | 10        |
| 80. | paresthesias                                                            | 10        |
| 81. | herbal                                                                  | 10        |
| 82. | remedy                                                                  | 10        |
| 83. | nutritional, nutrition                                                  | 10, 13    |
| 84. | methotrexate                                                            | 10        |
| 85. | narcotics                                                               | 10        |
| 86. | saline                                                                  | 10        |
| 87. | peroxide                                                                | 10        |

|      |                                 |       |
|------|---------------------------------|-------|
| 88.  | sodium                          | 11    |
| 89.  | primer                          | 11    |
| 90.  | ionomer                         | 11    |
| 91.  | adhesive                        | 11    |
| 92.  | flocked                         | 11    |
| 93.  | ultradent                       | 11    |
| 94.  | heliomolar                      | 11    |
| 95.  | microlux                        | 11    |
| 96.  | needles                         | 11    |
| 97.  | mercury                         | 11    |
| 98.  | neurons, neurotoxic, neuropathy | 1, 11 |
| 99.  | freeze, frozen                  | 11    |
| 100. | handpiece, handpieces           | 5, 11 |
| 101. | resorbable                      | 11    |
| 102. | glucose                         | 12    |
| 103. | alveolar                        | 6, 12 |
| 104. | peripheral                      | 1, 12 |
| 105. | medline                         | 12    |
| 106. | randomized, randomly            | 13    |
| 107. | pubmed                          | 13    |
| 108. | funded                          | 13    |
